# Supplementary material for: Lower Ventral Striatal Activation During Reward Anticipation in Adolescent Smokers
Source: Atypon-hosted journal article supplement (doi:10.1176/appi.ajp.2010.10071024), 2011-03-02
Supplement: ajp_168_05_540_01.pdf [file ajp_168_05_540_01.pdf]

**Supplementary Table 1.** Regions activated during reward anticipation (anticipation win > anticipation no win) in both smokers and controls (conjunction analysis) at  $p < 0.001$  uncorrected with at least 10 contiguous voxels.

| Area                       | No. Of Voxels | Coordinates | z-Value |
|----------------------------|---------------|-------------|---------|
| R Visual cortex            | 971           | 3 -90 -3    | 4.55    |
|                            |               | 15 -97 -3   | 4.54    |
|                            |               | 9 -84 -1    | 4.51    |
| L Visual cortex            | 1481          | -28 -91 -6  | 4.52    |
|                            |               | -20 -87 -11 | 4.50    |
|                            |               | -16 -96 -6  | 4.46    |
| L Midbrain                 | 117           | -6 -22 -5   | 4.08    |
|                            |               | -14 -19 -8  | 3.47    |
| L/R Medial Frontal Gyrus   | 292           | 8 6 55      | 3.96    |
|                            |               | 8 -4 60     | 3.81    |
|                            |               | -3 -3 -55   | 3.74    |
| R Cingulate gyrus          | 41            | 15 -19 36   | 3.95    |
| L/R Cingulate gyrus        | 116           | -3 -27 24   | 3.87    |
|                            |               | -6 -34 22   | 3.18    |
| L Ventral striatum         | 54            | -8 6 -1     | 3.81    |
| R Cerebellum               | 100           | 18 -88 -18  | 3.74    |
|                            |               | 32 -84 -21  | 3.33    |
| R Precentral gyrus         | 47            | 33 -19 46   | 3.68    |
| L Superior parietal cortex | 27            | -28 -48 36  | 3.60    |
| R Cerebellum               | 45            | 16 -63 -50  | 3.57    |
| L Middle frontal gyrus     | 46            | -24 -9 61   | 3.56    |
| R Ventral Striatum         | 42            | 18 17 -8    | 3.56    |
| L Cingulate                | 31            | -14 -27 36  | 3.49    |
| R Mid Cingulate            | 11            | 10 5 37     | 3.47    |
| R Cerebellum               | 20            | 10 -79 -15  | 3.43    |

|                    |    |            |      |
|--------------------|----|------------|------|
| R Precentral Gyrus | 13 | 35 -1 48   | 3.38 |
| L Mid Cingulate    | 10 | -6 -1 39   | 3.36 |
| L Precentral Gyrus | 12 | -34 -21 51 | 3.26 |

**Supplementary Table 2.** Regions showing increased reward anticipation-related activity in the controls compared to the smokers (two sample t-test) at  $p < 0.001$  uncorrected with at least 10 contiguous voxels.

| Area                                         | No. of Voxels | Coordinates | z-Value |
|----------------------------------------------|---------------|-------------|---------|
| R Superior Temporal Gyrus                    | 657           | 57 9 -2     | 5.10    |
|                                              |               | 59 -1 7     | 4.38    |
|                                              |               | 59 17 12    | 3.97    |
| L Cerebellum                                 | 396           | -10 -57 -50 | 4.80    |
| L Cingulate Gyrus                            | 1253          | -9 6 33     | 4.70    |
|                                              |               | -18 29 15   | 4.37    |
|                                              |               | -18 3 30    | 4.26    |
| L Superior Temporal Gyrus<br>/ Temporal Pole | 115           | -45 20 -27  | 4.66    |
|                                              |               | -38 15 -27  | 3.41    |
| L Superior Temporal Gyrus<br>/ Temporal Pole | 375           | -56 11 -5   | 4.57    |
|                                              |               | -50 8 -11   | 4.17    |
|                                              |               | -60 5 -1    | 3.73    |
| L Cerebellum                                 | 573           | -50 -54 -32 | 4.42    |
|                                              |               | -42 -69 -26 | 4.40    |
|                                              |               | -48 -63 -30 | 3.77    |
| L Ventral Striatum                           | 670           | -9 3 1      | 4.40    |
|                                              |               | -20 11 -6   | 4.09    |
|                                              |               | -28 35 -2   | 3.97    |
| R Middle Frontal Gyrus                       | 116           | 32 45 7     | 4.34    |

|                            |     |             |      |
|----------------------------|-----|-------------|------|
| L Precuneus                | 203 | -9 -63 61   | 4.33 |
| R Caudate/Ventral Striatum | 669 | 21 12 21    | 4.24 |
|                            |     | 10 -3 9     | 4.06 |
|                            |     | 8 17 -3     | 3.72 |
| R Cingulate/Insula         | 775 | 6 29 22     | 4.21 |
|                            |     | 30 23 10    | 4.20 |
|                            |     | 29 32 -2    | 4.04 |
| L Middle Temporal Gyrus    | 87  | -52 5 -23   | 4.18 |
| R Cingulate Gyrus          | 77  | 6 14 27     | 4.17 |
|                            |     | 10 20 31    | 3.59 |
| R Cerebellum               | 109 | 4 -55 -30   | 4.11 |
|                            |     | 2 -64 -33   | 3.21 |
| L Cerebellum               | 104 | -18 -55 -27 | 4.01 |
|                            |     | -12 -52 -33 | 3.32 |
| R Caudate/Putamen          | 138 | 18 15 3     | 3.98 |
|                            |     | 26 14 -5    | 3.25 |
| R Superior Frontal Gyrus   | 160 | 16 48 21    | 3.95 |
| R Rolandic Operculum       | 21  | 57 -21 15   | 3.95 |
| R Fusiform Gyrus           | 71  | 40 -43 -23  | 3.92 |
| R Fusiform Gyrus           | 16  | 36 -9 -32   | 3.86 |
| L Cerebellum               | 49  | -27 -49 -30 | 3.86 |
| Midbrain                   | 156 | 2 -36 -36   | 3.81 |
|                            |     | 0 28 -30    | 3.70 |
| R Caudate                  | 79  | 20 -16 21   | 3.76 |
|                            |     | 26 -21 15   | 3.21 |
| R Inferior Occipital Gyrus | 164 | 36 -79 -12  | 3.75 |
|                            |     | 46 -67 -14  | 3.25 |
| R Cerebellum               | 28  | 27 -60 -65  | 3.75 |
| R Thalamus                 | 39  | 2 -12 16    | 3.73 |
| L Orbitofrontal Cortex     | 36  | -32 23 -14  | 3.71 |
| L Midbrain                 | 41  | -12 -7 -8   | 3.71 |

|                            |    |             |      |
|----------------------------|----|-------------|------|
|                            |    | -10 - 9 1   | 3.48 |
| L Superior Frontal Gyrus   | 39 | -6 -7 67    | 3.68 |
| R Caudate/Putamen          | 50 | 20 14 12    | 3.68 |
| R Middle Frontal Gyrus     | 21 | 30 21 28    | 3.67 |
| L Superior Temporal Gyrus  | 35 | -51 -21 6   | 3.66 |
| R Cerebellum               | 60 | 22 -67 -53  | 3.63 |
| L Superior Temporal Gyrus  | 57 | -48 -9 -11  | 3.62 |
| R Superior Temporal Gyrus  | 27 | 52 -22 -5   | 3.60 |
| L Orbitofrontal Cortex     | 35 | -24 23 -21  | 3.60 |
| R Cerebellum               | 45 | 28 -60 -21  | 3.58 |
| L Claustrum                | 36 | -32 -4 -11  | 3.58 |
|                            |    | -34 -12 -9  | 3.33 |
| R Middle Temporal Gyrus    | 27 | 51 -55 -2   | 3.54 |
| R Middle Frontal Gyrus     | 18 | 32 38 27    | 3.54 |
| L Fusiform Gyrus           | 10 | -33 -61 -14 | 3.50 |
| R Insula                   | 17 | 48 -30 18   | 3.49 |
| R Superior Frontal Gyrus   | 26 | 21 -3 75    | 3.48 |
| L Inferior Frontal Gyrus   | 20 | -54 12 16   | 3.47 |
| L Superior Temporal Gyrus  | 28 | -62 -19 6   | 3.46 |
| R Insula                   | 16 | 39 -7 15    | 3.45 |
| L Inferior Parietal Lobule | 13 | -48 -28 27  | 3.44 |
| L Caudate                  | 37 | -16 -10 19  | 3.44 |
| L Cerebellum               | 14 | -16 -76 -32 | 3.44 |
| R Middle Occipital Gyrus   | 33 | 34 -79 9    | 3.42 |
| L Middle Occipital Gyrus   | 16 | -30 -87 12  | 3.38 |
| R Putamen                  | 14 | 21 -6 7     | 3.36 |
| L Caudate                  | 32 | -15 -3 18   | 3.34 |
| L Postcentral Gyrus        | 16 | -60 -21 19  | 3.33 |
| Brainstem                  | 14 | -2 -40 -50  | 3.32 |
| L Ventral Striatum         | 26 | -16 8 -12   | 3.30 |
| L Medial Frontal Gyrus     | 16 | -6 8 51     | 3.30 |

|                            |    |             |      |
|----------------------------|----|-------------|------|
| R Anterior Cingulate       | 11 | 8 32 6      | 3.29 |
| L Superior Frontal Gyrus   | 12 | -21 -7 69   | 3.29 |
| L Cerebellum               | 14 | -6 -76 -33  | 3.28 |
| L Brainstem                | 16 | -12 -27 -38 | 3.26 |
| R Putamen                  | 11 | 29 -7 9     | 3.26 |
| R Inferior Occipital Gyrus | 25 | 32 -97 -3   | 3.25 |
| R Precuneus                | 10 | 9 -48 61    | 3.22 |

Supplementary Table 3. Regions in which reward anticipation related activity in the smokers is correlated with smoking frequency ( $p < 0.001$ , at least 10 contiguous voxels).

| Area                                          | No. of Voxels | Coordinates | z-Value |
|-----------------------------------------------|---------------|-------------|---------|
| <b><i>Negative correlation</i></b>            |               |             |         |
| L Cingulate Gyrus                             | 186           | -3 -25 37   | 4.47    |
| L Inferior Frontal Gyrus                      | 161           | -46 27 3    | 4.44    |
| L Anterior Cingulate                          | 138           | -9 8 25     | 4.38    |
| L/R Precuneus / Posterior Cingulate           | 658           | -12 -54 28  | 4.28    |
|                                               |               | 0 -45 45    | 3.59    |
|                                               |               | 2 -66 34    | 3.57    |
| L Middle Temporal Gyrus                       | 167           | -60 -10 -14 | 4.26    |
|                                               |               | -54 -6 -20  | 3.34    |
| L Inferior Frontal Gyrus                      | 92            | -48 8 -6    | 4.24    |
|                                               |               | -50 15 21   | 4.20    |
|                                               |               | -51 14 7    | 3.80    |
| L Middle Temporal Gyrus                       | 160           | -60 5 -15   | 4.20    |
| R Anterior Cingulate / Superior Frontal Gyrus | 580           | 2 44 15     | 4.18    |
|                                               |               | 8 48 18     | 4.15    |

|                                              |     |             |      |
|----------------------------------------------|-----|-------------|------|
|                                              |     | 14 50 27    | 3.64 |
| R Cerebellum                                 | 81  | 8 -54 -11   | 4.17 |
| L Parahippocampal Gyrus /<br>Hippocampus     | 511 | -18 -37 -12 | 4.14 |
|                                              |     | -15 -27 -9  | 3.89 |
|                                              |     | -28 -22 -12 | 3.60 |
| R Parahippocampal Gyrus                      | 87  | 15 -34 -12  | 4.12 |
| R Middle Temporal Gyrus                      | 75  | 53 4 -30    | 4.11 |
| R Cerebellum                                 | 60  | 36 -54 -45  | 4.01 |
| R Parahippocampal Gyrus /<br>Hippocampus     | 83  | 21 -25 -6   | 3.94 |
|                                              |     | 30 -31 -5   | 3.21 |
| R Amygdala / Lateral<br>Orbitofrontal Cortex | 134 | 27 2 -14    | 3.89 |
|                                              |     | 30 14 -12   | 3.80 |
| L Amygdala                                   | 107 | -21 -3 -24  | 3.89 |
| L Superior Frontal Gyrus                     | 145 | -14 59 19   | 3.84 |
|                                              |     | -18 56 12   | 3.48 |
|                                              |     | -4 59 22    | 3.36 |
| R Superior Frontal Gyrus                     | 45  | 22 33 37    | 3.84 |
| L Superior Frontal Gyrus                     | 44  | -20 44 37   | 3.81 |
| R Precuneus                                  | 85  | 10 -51 28   | 3.81 |
|                                              |     | 6 -57 19    | 3.27 |
| R Medial Frontal Gyrus                       | 16  | 12 -9 66    | 3.79 |
| L Cerebellum                                 | 192 | -22 -85 -44 | 3.79 |
|                                              |     | -34 -88 -32 | 3.49 |
| R Precuneus                                  | 34  | 6 -39 63    | 3.74 |
| R Precentral Gyrus                           | 21  | 64 2 28     | 3.74 |
| L Superior Temporal Gyrus                    | 30  | -62 -52 19  | 3.72 |
| L Insula                                     | 37  | -39 -12 -5  | 3.70 |
| L Parahippocampal Gyrus                      | 43  | -12 2 -18   | 3.69 |

|                            |     |             |      |
|----------------------------|-----|-------------|------|
| L Lingual Gyrus            | 81  | -28 -85 -3  | 3.65 |
| L Precuneus                | 39  | -8 -72 39   | 3.65 |
| L Inferior Parietal Lobule | 107 | -45 -61 43  | 3.62 |
|                            |     | -44 -57 34  | 3.43 |
| L Supramarginal Gyrus      | 23  | -62 -45 28  | 3.62 |
| L Midbrain                 | 13  | -2 -21 -15  | 3.62 |
| L Inferior Temporal Gyrus  | 39  | -52 -3 -32  | 3.61 |
| L Cingulate                | 10  | -6 -12 31   | 3.59 |
| R Superior Temporal Gyrus  | 23  | 45 9 -29    | 3.59 |
| R Superior Temporal Gyrus  | 20  | 46 -21 -8   | 3.59 |
| R Cerebellum               | 68  | 12 -82 -41  | 3.58 |
|                            |     | 4 -82 -38   | 3.53 |
| L Cuneus                   | 66  | -12 -87 -6  | 3.55 |
| L Temporal pole            | 35  | -52 12 -35  | 3.54 |
|                            |     | -50 6 -30   | 3.23 |
| R Medial Frontal Gyrus     | 11  | 4 39 48     | 3.52 |
| R Cerebellum               | 108 | 20 -73 -26  | 3.51 |
|                            |     | 12 -67 -23  | 3.38 |
| L Cingulate Gyrus          | 14  | -12 12 36   | 3.49 |
| R Inferior Temporal Gyrus  | 17  | 51 -63 -6   | 3.48 |
| L Hippocampus              | 28  | -34 -12 -18 | 3.47 |
| L Anterior Cingulate       | 17  | -10 44 1    | 3.47 |
| L Cerebellum               | 27  | -15 -79 -18 | 3.46 |
| L Inferior Frontal Gyrus   | 31  | -34 26 1    | 3.44 |
| L Middle Temporal Gyrus    | 17  | -57 -34 -14 | 3.44 |
| R Anterior Cingulate       | 20  | 14 35 31    | 3.44 |
| L Cingulate                | 12  | -8 -6 39    | 3.43 |
| R Angular Gyrus            | 24  | 45 -64 34   | 3.40 |
| L Cingulate                | 21  | -8 30 28    | 3.40 |
| L Inferior Frontal Gyrus   | 16  | -42 38 9    | 3.40 |
| R Precuneus                | 40  | 12 -63 19   | 3.39 |

|                                   |    |             |      |
|-----------------------------------|----|-------------|------|
| L Cerebellum                      | 48 | -42 -69 -51 | 3.38 |
| R Inferior Frontal Gyrus          | 10 | 51 39 4     | 3.37 |
| R Lingual Gyrus                   | 17 | 21 -67 -11  | 3.36 |
| L Cerebellum                      | 57 | -18 -70 -26 | 3.36 |
|                                   |    | -10 -70 -23 | 3.35 |
| L Medial Orbital Gyrus            | 19 | -4 59 -20   | 3.33 |
| R Temporal Pole                   | 14 | 27 3 -36    | 3.32 |
| L Inferior Occipital Gyrus        | 13 | -28 -93 -18 | 3.32 |
| R Middle / Inferior Frontal Gyrus | 11 | 48 21 13    | 3.32 |
| L Parahippocampal Gyrus           | 27 | -14 -42 -2  | 3.31 |
| R Parahippocampal Gyrus           | 11 | 21 -10 -30  | 3.30 |
| R Cerebellum                      | 10 | 8 -85 -29   | 3.29 |
| L Inferior Temporal Gyrus         | 17 | -62 -60 -9  | 3.29 |
| L Superior Frontal Gyrus          | 24 | -3 51 34    | 3.29 |
| R Postcentral Gyrus               | 28 | 51 -27 43   | 3.29 |
|                                   |    | 57 -21 39   | 3.28 |
| L Cerebellum                      | 18 | -27 -73 -41 | 3.28 |
| R Anterior Cingulate              | 12 | 9 38 6      | 3.26 |
| R Cingulate                       | 33 | 6 21 22     | 3.24 |
|                                   |    | 6 14 18     | 3.19 |
| R Parahippocampal Gyrus           | 14 | 9 -36 6     | 3.21 |

***Positive correlation***

No voxels survive threshold
